# Supplementary material for: Systemic Beta-Hydroxybutyrate Affects BDNF and Autophagy into the Retina of Diabetic Mice
Source: MDPI journal article supplement (doi:10.3390/ijms231710184), 2022-09-05
Supplement: s1 [file s1]

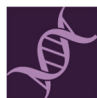

# Systemic Beta-Hydroxybutyrate Affects BDNF and Autophagy into the Retina of Diabetic Mice

Maria Consiglia Trotta <sup>1,†</sup>, Carlo Gesualdo <sup>2,†</sup>, Hildegard Herman <sup>3</sup>, Sami Gharbia <sup>3</sup>, Cornel Balta <sup>3</sup>, Caterina Claudia Lepre <sup>1</sup>, Marina Russo <sup>1</sup>, Annalisa Itró <sup>4</sup>, Giovanbattista D'Amico <sup>1</sup>, Luisa Peluso <sup>1</sup>, Iacopo Panarese <sup>5</sup>, Gorizio Pieretti <sup>2</sup>, Giuseppe Ferraro <sup>2</sup>, Francesca Simonelli <sup>2</sup>, Michele D'Amico <sup>1,‡</sup>, Settimio Rossi <sup>2,\*‡</sup> and Anca Hermenean <sup>3,‡</sup>

<sup>1</sup> Department of Experimental Medicine, University of Campania “Luigi Vanvitelli”, Via Santa Maria di Costantinopoli 16, 80138 Naples, Italy

<sup>2</sup> Eye Clinic, Multidisciplinary Department of Medical, Surgical and Dental Sciences, University of Campania “Luigi Vanvitelli”, Via Luigi de Crecchio 6, 80138 Naples, Italy

<sup>3</sup> “Aurel Ardelean” Institute of Life Sciences, Vasile Goldis Western University of Arad, 86 Revolutiei Av., 310414 Arad, Romania

<sup>4</sup> PhD Course in Translational Medicine (XXXV Cycle), Department of Experimental Medicine, University of Campania “Luigi Vanvitelli”, Via Santa Maria di Costantinopoli 16, 80138 Naples, Italy

<sup>5</sup> Department of Mental and Physical Health and Preventive Medicine, University of Campania “Luigi Vanvitelli”, Largo Madonna delle Grazie 1, 80138 Naples, Italy

\* Correspondence: [settimio.rossi@unicampania.it](mailto:settimio.rossi@unicampania.it)

† These authors contributed equally to this work.

‡ These authors contributed equally to this work.

## Supplementary Materials

**Table S1. Fasting blood glucose levels monitored during the 10-week BHB treatments. \*\* P < 0.01 vs CTRL.**

|                | Blood glucose levels (mg/dl) |             |             |             |             |             |
|----------------|------------------------------|-------------|-------------|-------------|-------------|-------------|
|                | Diabetes de-<br>velopment    | Week 2      | Week 4      | Week 6      | Week 8      | Week 10     |
| <b>CTRL</b>    | 95 ± 15                      | 92 ± 11     | 100 ± 5     | 87 ± 8      | 94 ± 10     | 98 ± 6      |
| <b>BHB 100</b> | 285 ± 23 **                  | 291 ± 28 ** | 284 ± 20 ** | 288 ± 17 ** | 275 ± 18 ** | 274 ± 13 ** |
| <b>BHB 50</b>  | 292 ± 28 **                  | 294 ± 21 ** | 289 ± 24 ** | 291 ± 25 ** | 287 ± 20 ** | 280 ± 19 ** |
| <b>BHB 25</b>  | 294 ± 24 **                  | 297 ± 17 ** | 291 ± 24 ** | 293 ± 15 ** | 288 ± 24 ** | 281 ± 25 ** |
| <b>STZ</b>     | 290 ± 22 **                  | 293 ± 27 ** | 280 ± 17 ** | 284 ± 19 ** | 271 ± 12 ** | 265 ± 10 ** |

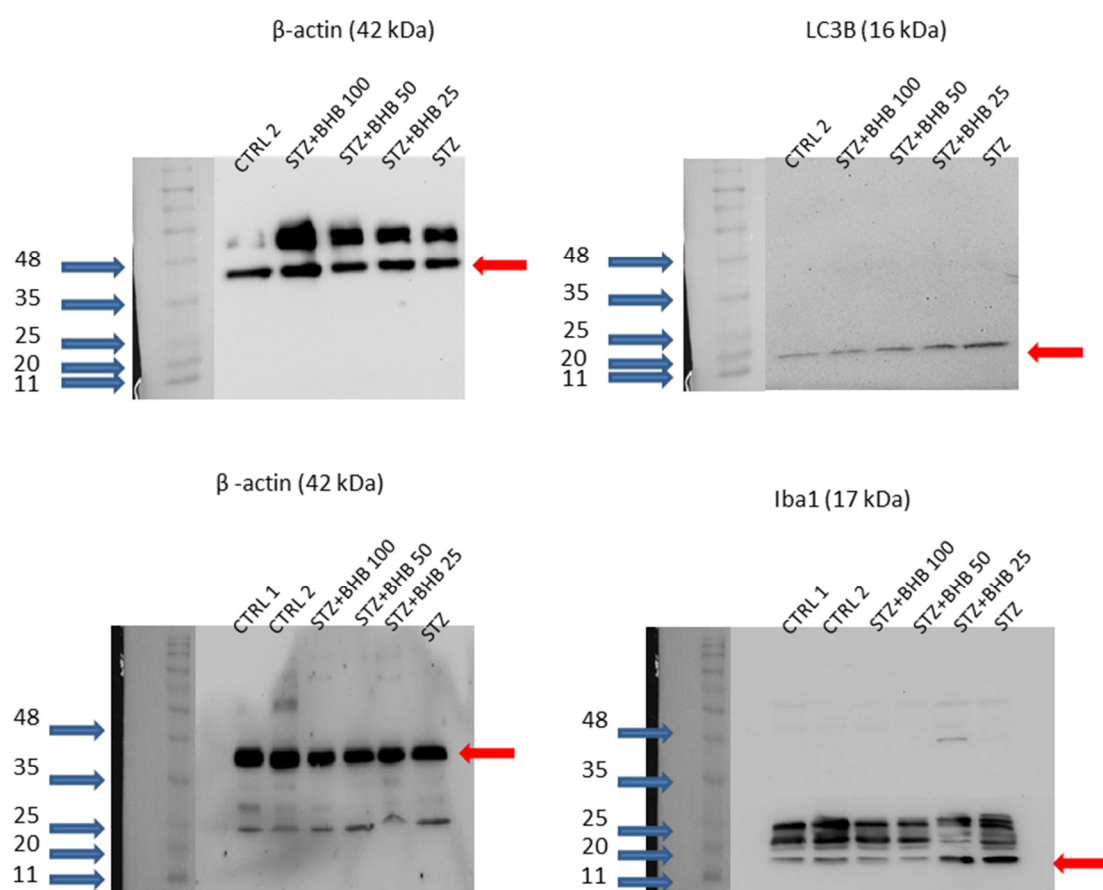

**Figure S1. Uncropped images of representative  $\beta$ -actin, LC3B and Iba1 Western Blotting membranes.**

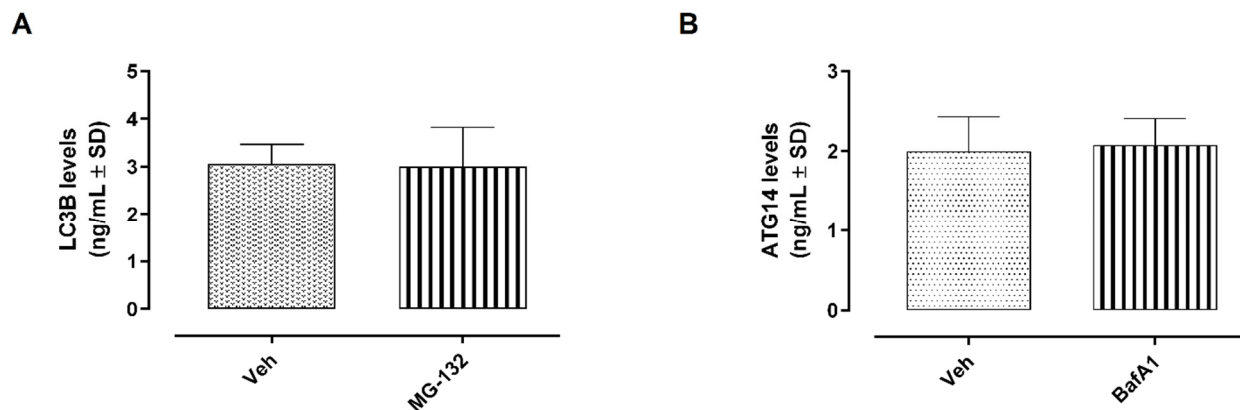

**Figure S2. LC3B and ATG14 levels in STZ mice treated with MG-132 and bafilomycin A1.** (A) LC3B levels, detected by ELISA Kit (ABIN6957822; Biocompare, Milan, Italy) after 2 weeks from contemporaneous i.p injections of STZ (75 mg/kg, single administration) and vehicle (Veh group; 0.5% DMSO) or STZ and MG-132 (MG-132 group; 10 µg/kg daily for 2 weeks). (B) ATG14 levels, detected by ELISA Kit (abx503511; abbexa, Cambridge, UK) after 2 weeks from contemporaneous i.p injections of STZ and vehicle (Veh group; 0.5% DMSO) or STZ and bafilomycin A1 (BafA1 group; 0.3 mg/kg daily, for 3 days).
